# Supplementary material
Source: PubMed Central journal article supplement (PMC6322462)
Supplement: 31d96dae5c0637ff4fb9b9579470a0f7_JCM.01487-18-s0001.pdf [file 31d96dae5c0637ff4fb9b9579470a0f7_JCM.01487-18-s0001.pdf]

**Supplemental Material**

**Table S1.** Algorithm for determining RPR titer concordance. Values were considered concordant if the predicate and BioPlex 2200

RPR methods resulted within  $\pm 1$  doubling dilution.

|                           |       |      |      |      |      |      |       |       |       |
|---------------------------|-------|------|------|------|------|------|-------|-------|-------|
| Predicate RPR<br>titer    | 0     | 1:1  | 1:2  | 1:4  | 1:8  | 1:16 | 1:32  | 1:64  | >1:64 |
| Concordant                | 0     | 0    | 0    | <1:4 | 1:4  | 1:8  | 1:16  | 1:32  | >1:64 |
| BioPlex 2200<br>RPR titer | < 1:4 | <1:4 | <1:4 | 1:4  | 1:8  | 1:16 | 1:32  | >1:64 |       |
|                           |       |      | 1:4  | 1:8  | 1:16 | 1:32 | >1:64 |       |       |
